# Supplementary material
Source: bioRxiv or medRxiv preprint supplement (http://medrxiv.stage.highwire.org/highwire/filestream/69077/field_highwire_adjunct_files/0/19006221-1.pdf)
Supplement: Supplementary file [file 19006221-1.pdf]

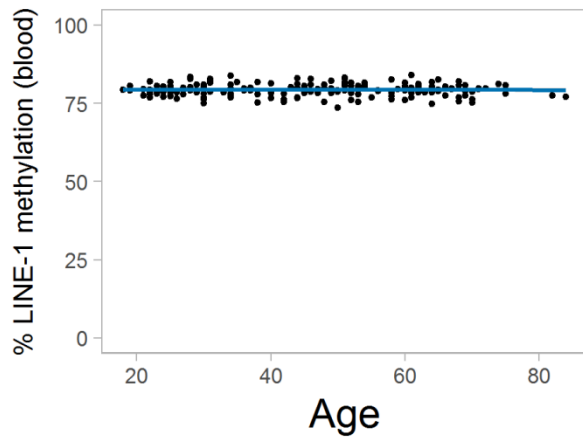

**Fig. S1.** LINE1 methylation in blood. Mean DNA methylation of LINE1 repetitive elements were measured in blood DNA and no association could be found with age. Linear trend is displayed in blue and 95% confidence interval in grey shading (not visible due to scale).
